# Supplementary material
Source: Springer Nature journal article supplement (https://www.springermedizin.de/resource/supplementary/12955_2009_566_MOESM2_ESM.pdf/9560718)

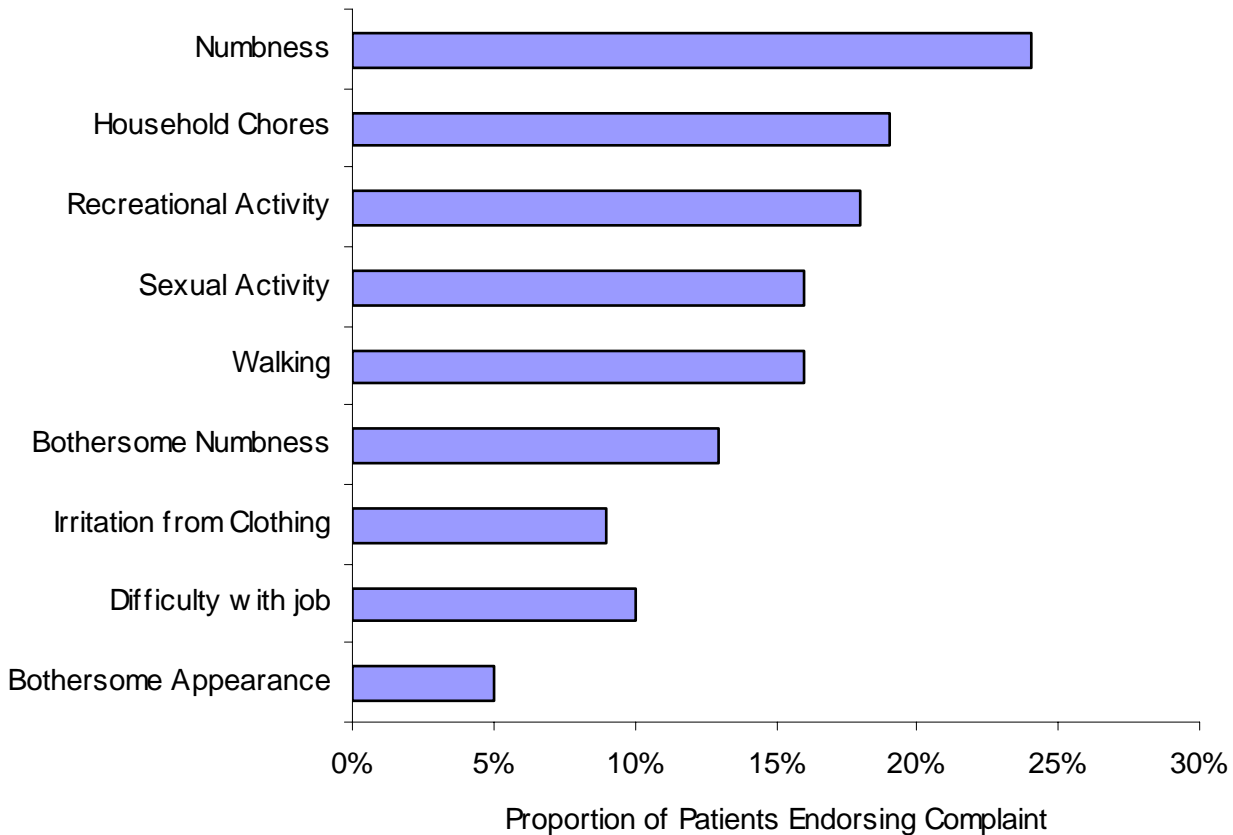

Supplement: MOESM2 [file 9560718]
